# Supplementary material for: Intracerebral microdialysis of adenosine and adenosine monophosphate – a systematic review and meta‐regression analysis of baseline concentrations
Source: PubMed Central journal article supplement — J Neurochem. 2018 Sep 27;147(1):58–70. doi: 10.1111/jnc.14552 (PMC6220825; doi:10.1111/jnc.14552), 2018-09-27
Supplement: JNC-147-58-s001.pdf [file JNC-147-58-s001.pdf]

## Appendices with Intracerebral microdialysis of adenosine and AMP - a systematic review and meta-regression analysis of baseline concentrations

Stevie van der Mierden, Sergey A. Savelyev, Joanna IntHout, Rob B.M. de Vries, Cathalijn H.C. Leenaars

Appendix 1: Study characteristics of papers reporting baseline adenosine concentrations

Appendix 2: Study characteristics of papers and abstracts not reporting absolute baseline adenosine concentrations or only reporting them in low-resolution figures

Appendix 3: AMP concentrations and corresponding study characteristics

References with appendices

### Appendix 1: Study characteristics of papers reporting baseline adenosine concentrations

| Study Reference                       | N  | Species              | Age /weight                  | Sex  | Flow rate (µL/min) | Probe diameter (mm) | Probe length (mm) | Membrane                        | Location        | Detection    | Washout     | Anaesthesia during µD    |
|---------------------------------------|----|----------------------|------------------------------|------|--------------------|---------------------|-------------------|---------------------------------|-----------------|--------------|-------------|--------------------------|
| (Aden <i>et al.</i> 2004)             | 6  | Rats, Sprague-Dawley | 300 - 350 g                  | Male | 2.5                | 0.5                 | 1                 | CMA/12                          | Hippocampus     | RP- HPLC-UVD | ~60-120 min | Sodium Pentobarbital     |
| (Andine <i>et al.</i> 1990)           | 16 | Rats, Wistar         | 300 - 350 g                  | Male | 2.5                | 0.3                 | 5-6               |                                 | Hippocampus     | LC-UVD       | 120 min     | Halothane                |
| (Ballarin <i>et al.</i> 1987)         | 5  | Rats, Sprague-Dawley | 430 - 550 g,<br>6 - 8 months | Male | 2                  | 0.5                 | 4                 |                                 | Striatum        | HPLC-UVD     | 75 min      | Halothane                |
| (Ballarin <i>et al.</i> 1989)         | 6  | Rats, Sprague-Dawley | 180 - 200 g                  | Male | 2                  |                     | 4                 |                                 | Striatum        | HPLC-UVD     | None        | Freely behaving          |
| (Ballarin <i>et al.</i> 1991)A        | 18 | Rats, Sprague-Dawley | 200 - 250 g                  | Male | 2                  | 0.5                 | 4                 |                                 | Striatum        | HPLC-UVD     | None        | Freely behaving          |
| (Ballarin <i>et al.</i> 1991)B        | 8  | Rats, Sprague-Dawley | 200 - 250 g                  | Male | 2                  | 0.5                 | 4                 |                                 | Striatum        | HPLC-UVD     | None        | Freely behaving          |
| (Basheer <i>et al.</i> 1999)          | 7  | Rats, Long-Evans     | 350 - 450 g                  | Male | 1.5                |                     |                   |                                 | Basal forebrain | HPLC-UVD     | 180 min     | Freely behaving          |
| (Bennett <i>et al.</i> 2000)          | 37 | Rats, Wistar         | 250 - 300 g                  | Male | 2                  |                     | 2                 | 10 kDa cut off                  | Cortex          | HPLC         | None        | Freely behaving          |
| (Bennett <i>et al.</i> 2003)A         | 51 | Rats, Wistar         | 250 - 300 g                  | Male | 2                  |                     | 2                 | 10 kDa cut off                  | Cortex          | HPLC         | None        | Freely behaving          |
| (Bennett <i>et al.</i> 2003)B         | 87 | Rats, Wistar         | 250 - 300 g                  | Male | 2                  |                     | 2                 | 10 kDa cut off                  | Cortex          | HPLC         | None        | Freely behaving          |
| (Berman <i>et al.</i> 2000)A          | 4  | Rats, Sprague-Dawley | 300 - 350 g                  | Male | 2.5                | 0.5                 | 1.0               |                                 | Hippocampus     | RP-HPLC-UVD  | None        | Urethane                 |
| (Berman <i>et al.</i> 2000)B          | 6  | Rats, Sprague-Dawley | 300 - 350 g                  | Male | 2.5                | 0.5                 | 1.0               |                                 | Hippocampus     | RP-HPLC-UVD  | None        | Urethane                 |
| (Berman <i>et al.</i> 2000)C          | 6  | Rats, Sprague-Dawley | 300 - 350 g                  | Male | 2.5                | 0.5                 | 1.0               |                                 | Hippocampus     | RP-HPLC-UVD  | None        | Urethane                 |
| (Berman <i>et al.</i> 2000)D          | 5  | Rats, Sprague-Dawley | 300 - 350 g                  | Male | 2.5                | 0.5                 | 1.0               |                                 | Hippocampus     | RP-HPLC-UVD  | None        | Urethane                 |
| (Blanco-Centurion <i>et al.</i> 2006) | 6  | Rats, Sprague-Dawley | > 250 g                      |      | 0.25               | 0.34                | 1                 | Polyacrylonitrile30 kDa cut off | Basal forebrain | HPLC-UVD     | 24 hours    | Freely behaving          |
| (Britton <i>et al.</i> 1999)A         | 6  | Rats, Sprague-Dawley | 300 g                        | Male | 2.0                |                     |                   |                                 | Caudate nucleus | HPLC-FD      | 60 min      | Chloral hydrate          |
| (Britton <i>et al.</i> 1999)B         | 5  | Rats, Sprague-Dawley | 300 g                        | Male | 2.0                |                     |                   |                                 | Caudate nucleus | HPLC-FD      | 60 min      | Chloral hydrate          |
| (Butcher <i>et al.</i> 1987)          | 6  | Rats, Sprague-Dawley | 280 - 350 g                  | Both | 2.5                | 0.3                 | 5-6               |                                 | Striatum        | RP-HPLC-UVD  | 60 - 90 min | Methohexital - Halothane |

| Study Reference                  | N    | Species                      | Age /weight   | Sex  | Flow rate (µL/min) | Probe diameter (mm) | Probe length (mm) | Membrane                         | Location        | Detection             | Washout   | Anaesthesia during µD |
|----------------------------------|------|------------------------------|---------------|------|--------------------|---------------------|-------------------|----------------------------------|-----------------|-----------------------|-----------|-----------------------|
| (Carrozzo <i>et al.</i> 2012)    | 3    | Mice                         |               |      | 1.1                | 0.24                | 2                 | Cuprophane, 6 kDa cut off        | Striatum        | Column Switching HPLC | 120 min   | Flurothane            |
| (Carswell <i>et al.</i> 1997)    | 10   | Rats, Wistar                 | 270 - 310 g   | Male | 2                  | 0.3                 | 4                 | Polyacrylonitrile24 kDa cut off  | Hippocampus     | HPLC-UVD              | 100 min   | Urethane              |
| (Chen & Stone 1991)              | 4    | Rats, Wistar                 | 270 - 310 g   | Male | 2                  | 0.3                 | 4                 | polyacrylonitrile                | Hippocampus     | HPLC-UVD              | none      | Urethane              |
| (Chen <i>et al.</i> 1992)A       | 63   | Rats, Wistar                 | 270 - 310 g   | Male | 2                  | 0.3                 | 4                 | polyacrylonitrile                | Hippocampus     | HPLC-UVD              | 120 min   | Urethane              |
| (Chen <i>et al.</i> 1992)B       |      | Rats                         |               | Male | 2                  |                     | 4                 | polyacrylonitrile                | Hippocampus     | HPLC-UVD              |           | Urethane              |
| (Chen <i>et al.</i> 1993)        |      | Rats                         |               |      |                    |                     |                   |                                  | Brain           | HPLC-UVD              |           |                       |
| (Cui <i>et al.</i> 2013)         | 6-8  | Mice, C57BL/6                | 18 - 25 g     | Male | 2                  |                     | 2                 |                                  | Striatum        | RP-HPLC-UVD           | 120 min   | Freely behaving       |
| (Cui <i>et al.</i> 2016)         | 9-11 | Mice, C57BL/6                | 18 - 25 g     | Male | 2                  |                     | 2                 |                                  | Striatum        | HPLC                  | 60 min    | Freely behaving       |
| (Deng <i>et al.</i> 2003)        | 5    | Rats, Sprague-Dawley         | 250 - 350 g   | Male | 0.6                | 0.200               | 2                 | 18 kDa cut off                   | Cortex          | HPLC-UVD              |           | Chloral hydrate       |
| (Dobolyi <i>et al.</i> 1997)     |      | Rat                          |               |      |                    |                     |                   |                                  |                 |                       |           |                       |
| (Dobolyi <i>et al.</i> 1998)     | 13   | Rats                         | 350 - 400 g   |      | 1                  | 0.2                 | 3                 | 5 kDa cut off                    | Thalamus        | HPLC-UVD              | none      | Halothane             |
| (Dobolyi <i>et al.</i> 1999)A    | 3    | Rats                         | 350- 400 g    |      | 2                  | 0.2                 | 1.5               | 5 kDa cut off                    | Thalamus        | HPLC-UVD              | 60 min    | Halothane             |
| (Dobolyi <i>et al.</i> 1999)B    | 6    | Rats                         | 350- 400 g    |      | 2                  | 0.2                 | 1.5               | 5 kDa cut off                    | Hippocampus     | HPLC-UVD              | 60 min    | Halothane             |
| (Dobolyi <i>et al.</i> 2000)     | 35   | Rats, Wistar                 | 350 - 400 g   | Male | 1                  | 0.2                 | 3                 | 5 kDa cut off                    | Thalamus        | HPLC-UVD              | 60 min    | Halothane             |
| (Dohmen <i>et al.</i> 2001)A     | 8    | Cats                         | 3.1 - 4.8 kg  | Male | 2                  | 0.5                 | 1                 |                                  | Thalamus        | HPLC-UVD              | < 2 hours | α-chloralose          |
| (Dohmen <i>et al.</i> 2001)B     | 10   | Cats                         | 3.1 - 4.8 kg  | Male | 2                  | 0.5                 | 1                 |                                  | Cortex          | HPLC-UVD              | < 2 hours | α-chloralose          |
| (Dux <i>et al.</i> 1990)A        | 5    | Gerbrils                     | 50 - 60 g     | Male |                    | 0                   | 1                 |                                  | Hippocampus     | HPLC-UVD              |           | Halothane             |
| (Dux <i>et al.</i> 1990)B        | 5    | Gerbrils                     | 50 - 60 g     | Male |                    |                     | 2                 |                                  | Striatum        | HPLC-UVD              |           | Halothane             |
| (Fu <i>et al.</i> 2015)          | 5    | Rabbits, new zealand rabbits | 3.2 - 3.6 kg  | Male | 2                  |                     |                   |                                  | Cerebellum      | HPLC-UVD              | 360 min   |                       |
| (Gianfriddo <i>et al.</i> 2003)  | 9    | Rats, Wistar                 | 250 - 280 g   | Male |                    |                     |                   |                                  | Striatum        | HPLC-Spect            | 30 min    | Freely behaving       |
| (Gianfriddo <i>et al.</i> 2004)A | 5    | Mice, R6/2 WT (B6CBA-TgN)    | 10 - 11 weeks |      | 3                  | 0.24                | 2                 | Cuprophane, 6 kDa cut off        | Striatum        | HPLC-Spect            | 160 min   | Freely behaving       |
| (Gianfriddo <i>et al.</i> 2004)B | 5    | Mice, R6/2 HD-Transgenic     | 10 - 11 weeks |      | 3                  | 0.24                | 2                 | Cuprophane, 6 kDa cut off        | Striatum        | HPLC-Spect            | 160 min   | Freely behaving       |
| (Gidday <i>et al.</i> 1996)      | 9    | Pigs                         | 1.8 - 2.8 kg  |      | 2                  | 0.15                | 5                 |                                  | Cortex          | HPLC                  | 60 min    | Ketamine              |
| (Grabb <i>et al.</i> 1998)A      | 12   | Rats, Wistar                 | 300 - 500 g   | Male | 0.5                | 0.3                 | 5                 | Cellulose acetate, 5 kDa cut off | Caudate nucleus | RP-HPLC-UVD           | 24 hours  | Halothane             |
| (Grabb <i>et al.</i> 1998)B      | 7    | Rats, Wistar                 | 300 - 500 g   | Male | 0.5                | 0.3                 | 5                 | Cellulose acetate, 5 kDa cut off | Caudate nucleus | RP-HPLC-UVD           | 120 min   | Halothane             |

| Study Reference                  | N  | Species                    | Age /weight      | Sex  | Flow rate ( $\mu\text{L}/\text{min}$ ) | Probe diameter (mm) | Probe length (mm) | Membrane                         | Location         | Detection   | Washout   | Anaesthesia during $\mu\text{D}$ |
|----------------------------------|----|----------------------------|------------------|------|----------------------------------------|---------------------|-------------------|----------------------------------|------------------|-------------|-----------|----------------------------------|
| (Grabb et al. 1998)C             | 8  | Rats, Wistar               | 300 - 500 g      | Male | 0.5                                    | 0.3                 | 5                 | Cellulose acetate, 5 kDa cut off | Caudate nucleus  | RP-HPLC-UVD | 120 min   | Halothane                        |
| (Grabb et al. 1998)D             | 7  | Rats, Wistar               | 300 - 500 g      | Male | 0.5                                    | 0.3                 | 5                 | Cellulose acetate, 5 kDa cut off | Caudate nucleus  | RP-HPLC-UVD | 24 hours  | Halothane                        |
| (Hagberg et al. 1987)            | 24 | Rats, Sprague-Dawley       |                  | Male | 2.5                                    | 0.3                 |                   |                                  | Striatum         | HPLC-UVD    | 90 min    | Halothane                        |
| (Headrick et al. 1994)           | 6  | Rats, Sprague-Dawley       | 250 - 350 g      | Male | 2                                      | 0.3                 | 2.4               | 5 kDa cut off                    | Hippocampus      | HPLC        | 90 min    | Sodium pentobarbital             |
| (Herrera-Marschitz et al. 1994)A | 10 | Rats, Sprague-Dawley       | 500 - 600 g      | Male | 2                                      | 0.5                 | 4                 |                                  | Striatum         | RP-HPLC-UVD | < 120 min | Halothane                        |
| (Herrera-Marschitz et al. 1994)B | 10 | Rats, Sprague-Dawley       | 500 - 600 g      | Male | 2                                      | 0.5                 | 4                 |                                  | Striatum         | RP-HPLC-UVD | < 120 min | Halothane                        |
| (Hillered et al. 1989)           | 7  | Rats, Sprague-Dawley       | 350 - 450 g      | Male | 2                                      |                     | 3                 | CMA 10                           | Caudate putamen  | RP-HPLC-UVD | 30 min    | Chloral hydrate                  |
| (Kaku et al. 1994)A              | 5  | Rats, Wistar               | 270 - 330 g      | Male | 2                                      | 0.5                 | 2                 | 20 kDa cut off                   | Hippocampus      | HPLC-UVD    | 120 min   | Urethane                         |
| (Kaku et al. 1994)B              | 5  | Rats, Wistar               | 270 - 330 g      | Male | 2                                      | 0.5                 | 2                 | 20 kDa cut off                   | Hippocampus      | HPLC-UVD    | 120 min   | Urethane                         |
| (Kaku et al. 2001)               | 27 | Rats, Wistar               | 270 - 330 g      | Male | 2                                      | 0.5                 | 2                 | 20 kDa cut off                   | Hippocampus      | HPLC-UVD    | 120 min   | Urethane                         |
| (Kalinchuk et al. 2011)A         | 6  | Rats, Wistar               | 250 - 300 g      | Male | 1                                      | 0.24                | 2                 | Cuprophane, 6 kDa cut off        | Basal forebrain  | HPLC-UVD    | 16 hours  | Freely behaving                  |
| (Kalinchuk et al. 2011)B         | 6  | Rats, Wistar               | 250 - 300 g      | Male | 1                                      | 0.24                | 2                 | Cuprophane, 6 kDa cut off        | Cortex           | HPLC-UVD    | 16 hours  | Freely behaving                  |
| (Kim et al. 2010)                | 8  | Pigs                       | 1.8 - 2.8 kg     |      | 2                                      |                     | 5                 |                                  | Cortex           | RP-HPLC     | 60 min    | Ketamine - isoflurane            |
| (Kjellmer et al. 1989)A          | 5  | Sheep, fetal               | 2829 $\pm$ 744 g |      | 2.5                                    | 0.3                 | 2                 | 3000 Da cut-off                  | Cortex           | HPLC        | 30 min    | Ketamine - Chloralose            |
| (Kjellmer et al. 1989)B          | 5  | Sheep, fetal               | 2829 $\pm$ 744 g |      | 2.5                                    | 0.3                 | 2                 | 3000 Da cut-off                  | Nucleus Caudatus | HPLC        | 30 min    | Ketamine - Chloralose            |
| (Kondoh et al. 1999)             | 24 | Rats, Sprague-Dawley       | 250 - 350 g      |      | 2                                      |                     | 4                 |                                  | Caudate-putamen  | HPLC-UVD    | 60 min    | Pentobarbital                    |
| (Koos et al. 1997)               | 7  | Sheep, fetal               | Fetal, >0.8 term |      | 1.75                                   |                     | 4                 |                                  | Thalamus         | RP-HPLC-UVD |           | Halothane                        |
| (Lehmann et al. 1987)            | 7  | Rats, Sprague-Dawley       | 250 - 300 g      | Male | 2.5                                    | 0.3                 | 5-6               | Cuprophane                       | Hippocampus      | RP-HPLC-UVD | 120 min   | Urethane                         |
| (Li et al. 2011)A                | 8  | Rats, Sprague-Dawley       | 250 - 300 g      | Male | 1                                      |                     | 1                 |                                  | Hypothalamus     | HPLC-UVD    | 90 min    | Sodium Pentobarbital             |
| (Li et al. 2011)B                | 6  | Rats, Sprague-Dawley       | 250 - 300 g      | Male | 1                                      |                     | 1                 |                                  | Hypothalamus     | HPLC-UVD    | 90 min    | Sodium Pentobarbital             |
| (Li et al. 2011)C                | 8  | Rats, Sprague-Dawley       | 250 - 300 g      | Male | 1                                      |                     | 1                 |                                  | Hypothalamus     | HPLC-UVD    | 90 min    | Sodium Pentobarbital             |
| (Lutz & Kabler 1997)             | 18 | Turtles, Trachemys scripta | 500 - 1000 g     |      | 5                                      | 0.5                 |                   |                                  | Striatum         | HPLC-UVD    |           | Isoflurane                       |

| Study Reference                         | N  | Species                         | Age /weight  | Sex    | Flow rate ( $\mu\text{L}/\text{min}$ ) | Probe diameter (mm) | Probe length (mm) | Membrane                               | Location                    | Detection  | Washout       | Anaesthesia during $\mu\text{D}$ |
|-----------------------------------------|----|---------------------------------|--------------|--------|----------------------------------------|---------------------|-------------------|----------------------------------------|-----------------------------|------------|---------------|----------------------------------|
| (Lydic <i>et al.</i> 2010)              | 5  | Rats, Sprague-Dawley            | Adult        | Male   |                                        |                     |                   |                                        | Pontine Reticular Formation | HPLC-UVD   |               |                                  |
| (Masana <i>et al.</i> 1989)             |    | Gerbril                         |              |        |                                        |                     |                   |                                        |                             |            |               |                                  |
| (Materi & Semba 2001)                   |    | Rats, Wistar                    | 300 - 500 g  | Male   | 2                                      | 0.5                 | 2                 | 30 kDa cut-off                         | Cortex                      | HPLC-FD    | 90 min        | Urethane                         |
| (Matsumoto <i>et al.</i> 1992)A         | 9  | Cats                            | 2.8 - 4.8 kg | Both   | 2                                      | 0.5                 | 1                 |                                        | Cortex                      | HPLC-UVD   | 2 - 4 hours   | Ketamine - Halothane             |
| (Matsumoto <i>et al.</i> 1992)B         | 13 | Cats                            | 2.8 - 4.8 kg | Both   | 2                                      | 0.5                 | 1                 |                                        | Cortex                      | HPLC-UVD   | 2 - 4 hours   | Ketamine - Halothane             |
| (Maysinger <i>et al.</i> 1992)A         | 11 | Rats, Wistar                    | 300 - 350 g  | Male   | 2                                      | 0.5                 | 4                 |                                        | Striatum                    | HPLC       | 120 - 140 min | Halothane                        |
| (Maysinger <i>et al.</i> 1992)B         | 11 | Rats, Wistar                    | 300 - 350 g  | Male   | 2                                      | 0.5                 | 4                 |                                        | Cortex                      | HPLC       | 120 - 140 min | Halothane                        |
| (Melani <i>et al.</i> 1999a)            | 20 | Rats, Wistar                    | 270 - 290 g  | Male   | 3                                      | 0.31                | 3                 | 15 kDa cut off, AN 69 membrane         | Striatum                    | HPLC-FD    | 30 min        | Halothane                        |
| (Melani <i>et al.</i> 1999b)            | 11 | Rats, Sprague-Dawley            | 200 - 300 g  | Male   | 2                                      | 0.31                | 3.5               | 15 kDa cut off                         | Striatum                    | HPLC-FD    | 60 min        | Chloral hydrate                  |
| (Melani <i>et al.</i> 2003)             | 8  | Rats, Wistar                    | 270 - 290 g  | Male   | 3                                      | 0.31                | 3                 |                                        | Striatum                    | HPLC-FD    | 30 min        | Halothane                        |
| (Melani <i>et al.</i> 2012)A            | 3  | Rats, Wistar                    | 270 - 290 g  | Male   | 3                                      | 0.5                 | 3                 | Polyarylethersulph one, 20 kDa cut off | Striatum                    | HPLC-Spect | 90 min        | Freely behaving                  |
| (Melani <i>et al.</i> 2012)B            | 4  | Rats, Wistar                    | 270 - 290 g  | Male   | 3                                      | 0.5                 | 3                 | Polyarylethersulph one, 20 kDa cut off | Striatum                    | HPLC-Spect | 90 min        | Freely behaving                  |
| (Mijangos-Moreno <i>et al.</i> 2014)A   | 5  | Rats, Wistar                    | 250 - 300 g  | Male   | 0.25                                   | 0.34                | 1                 | Polyacrylonitrile, 30 kDa cut off      | Nucleus Accumbens           | HPLC-UVD   | 24 hours      | Freely behaving                  |
| (Mijangos-Moreno <i>et al.</i> 2014)B   | 5  | Rats, Wistar                    | 250 - 300 g  | Male   | 0.25                                   | 0.34*               | 1                 | Polyacrylonitrile, 30 kDa cut off      | Hypothalamus                | HPLC-UVD   | 24 hours      | Freely behaving                  |
| (Mijangos-Moreno <i>et al.</i> 2015)    | 10 | Rats, Wistar                    | 230 - 300 g  | Male   | 0.25                                   |                     | 1                 | Polyacrylonitrile, 30 kDa cut off      | Nucleus Accumbens           | HPLC-UVD   | 24 hours      | Freely behaving                  |
| (Miranda <i>et al.</i> 2014)            | 4  | Rats, Wistar                    | 250 - 300 g  | Male   | 1                                      | 0.5                 | 2                 | CMA/12                                 | Hippocampus                 | CEF-FD     |               | Freely behaving                  |
| (Morimoto <i>et al.</i> 1991)           | 9  | Gerbrils, Meriones unguiculatus | 50 - 60 g    | Female | 2                                      | 0.5                 | 2                 | CMMA/10                                |                             | HPLC-UVD   |               | Ketamine                         |
| (Moss <i>et al.</i> 1995)               |    | Pigs                            | 20 - 25 days |        |                                        |                     |                   |                                        |                             | HPLC-UVD   |               |                                  |
| (Murillo-Rodriguez <i>et al.</i> 2004)A | 8  | Rats, F344                      | 21.5 months  | Male   | 0.25                                   | 0.34                | 1                 | 30 kDa cut-off, BAS                    | Basal forebrain             | HPLC-UVD   | 24 hours      | Freely behaving                  |
| (Murillo-Rodriguez <i>et al.</i> 2004)B | 4  | Rats, F344                      | 3.5 months   | Male   | 0.25                                   | 0.34                | 1                 | 30 kDa cut-off, BAS                    | Basal forebrain             | HPLC-UVD   | 24 hours      | Freely behaving                  |

| Study Reference                        | N    | Species              | Age /weight           | Sex  | Flow rate (µL/min) | Probe diameter (mm) | Probe length (mm) | Membrane                               | Location                  | Detection         | Washout  | Anaesthesia during µD             |
|----------------------------------------|------|----------------------|-----------------------|------|--------------------|---------------------|-------------------|----------------------------------------|---------------------------|-------------------|----------|-----------------------------------|
| (Murillo-Rodriguez <i>et al.</i> 2008) | 9    | Rats, Sprague-Dawley | 285 - 370 g           | Male | 0.25               | 0.34                | 1                 | Polyacrylonitrile, 30 kDa cut off, BAS | Basal forebrain           | HPLC-UVD          | 12 hours | Freely behaving                   |
| (Nagel & Hauber 2002)                  | 13   | Rats, Sprague-Dawley | 220 - 280 g           | Male | 2                  | 0.5                 | 2                 | CMA/12                                 | Nucleus Accumbens         | RP-HPLC-FD        | 14 hours | Freely behaving                   |
| (Nagel & Hauber 2004)                  | 5    | Rats, Sprague-Dawley | 220 - 280 g           | Male | 2                  | 0.5                 | 2                 | CMA/12                                 | Nucleus Accumbens         | RP-HPLC-FD        | 14 hours | Freely behaving                   |
| (Nelson <i>et al.</i> 2009)A           | 3    | Rats, Sprague-Dawley | 300 g mean            | Male | 2                  | 0.24                | 1                 | Cuprophane, 6 kDa cut off, CMA         | Substantia Innominata     | HPLC-UVD          |          | Isoflurane                        |
| (Nelson <i>et al.</i> 2009)B           | 21   | Rats, Sprague-Dawley | 300 g mean            | Male | 2                  | 0.24                | 1                 | Cuprophane, 6 kDa cut off, CMA         | Pontine Reticular Fontine | HPLC-UVD          |          | Isoflurane                        |
| (Nilsson <i>et al.</i> 1990)A          | 4    | Rats, Sprague-Dawley | 244 - 484 g           | Male | 2                  |                     | 3                 | CMA/10                                 | Cortex                    | HPLC-UVD          | 60 min   | Halothane - N2O                   |
| (Nilsson <i>et al.</i> 1990)B          | 5    | Rats, Sprague-Dawley | 244 - 484 g           | Male | 2                  |                     | 3                 | CMA/10                                 | Cortex                    | HPLC-UVD          | 60 min   | Halothane - N2O                   |
| (Nilsson <i>et al.</i> 1990)C          | 8    | Rats, Sprague-Dawley | 244 - 484 g           | Male | 2                  |                     | 3                 | CMA/10                                 | Cortex                    | HPLC-UVD          | 60 min   | Halothane - N2O                   |
| (Nomoto <i>et al.</i> 1999)            | 4    | Marmoset             |                       |      | 2                  |                     |                   |                                        | Striatum                  | HPLC              | 2 hours  | Fixated - concious                |
| (Nomoto <i>et al.</i> 2000)            | 4    | Marmoset             |                       |      | 2                  |                     |                   |                                        | Striatum                  | HPLC-UVD          | 2 hours  | Fixated - concious                |
| (Northington <i>et al.</i> 1992)       | 15   | Rats, Wistar         | 300 - 450 g           | Male | 0.5                | 0.3                 | 3                 | 5 kDa cut off                          | Cortex                    | RP-HPLC           | 90 min   | Sodium Thimylal - Trifluoroethane |
| (Okada <i>et al.</i> 2003)             | 7(?) | Rats, Sprague-Dawley | 250 - 350 g           | Male | 2                  |                     | 1                 | CMA                                    | subarachnoid space        | HPLC-UVD          | 3 hours  | Urethane                          |
| (Park <i>et al.</i> 1988)              | 22   | Pigs                 | 0.8 - 2.4 kg, <5 days |      | 2                  | 0.3                 | 5                 | 5 kDa cut off, Clirans TH 10           | Cortex                    | HPLC              | 90 min   | Ketamine - Xylazine               |
| (Pazzagli <i>et al.</i> 1993)A         | 4    | Rats, Wistar         | 250 - 300 g           | Male | 2                  | 0.21                | 2 x 3.5           | 8 kDa cut off, Discap 120 E membrane   | Striatum                  | HPLC-UVD ; 254 nm | None     | Chloral hydrate                   |
| (Pazzagli <i>et al.</i> 1993)B         | 4    | Rats, Wistar         | 250 - 300 g           | Male | 2                  | 0.21                | 2 x 3.5           | 8 kDa cut off, Discap 120 E membrane   | Striatum                  | HPLC-UVD ; 254 nm | None     | Chloral hydrate                   |
| (Pazzagli <i>et al.</i> 1994)          | 16   | Rats, Wistar         | 250 - 300 g           | Male | 2                  | 0.31                | 8                 | 15 kDa cut off, AN 69 membrane         | Cortex                    | HPLC-FD           | 2 hours  | Freely behaving                   |
| (Pazzagli <i>et al.</i> 1995)A         | 18   | Rats, Wistar         | 3 months              | Male |                    |                     |                   |                                        | Striatum                  | HPLC-UVD          | 120 min  | Freely behaving                   |
| (Pazzagli <i>et al.</i> 1995)B         | 18   | Rats, Wistar         | 20 - 22 months        | Male |                    |                     |                   |                                        | Striatum                  | HPLC-UVD          | 120 min  | Freely behaving                   |
| (Peigen & Jing 1997)A                  | 6    | Rats, Wistar         | 200 - 250 g           | Male | 2.5                | 0.5                 | 4                 |                                        | Striatum                  | HPLC-UVD          | 60 min   | Chloral hydrate                   |
| (Peigen & Jing 1997)B                  | 6    | Rats, Wistar         | 200 - 250 g           | Male | 2.5                | 0.5                 | 4                 |                                        | Striatum                  | HPLC-UVD          | 60 min   | Chloral hydrate                   |

| Study Reference                       | N       | Species                        | Age /weight  | Sex  | Flow rate (µL/min) | Probe diameter (mm) | Probe length (mm) | Membrane                                      | Location                            | Detection   | Washout | Anaesthesia during µD             |
|---------------------------------------|---------|--------------------------------|--------------|------|--------------------|---------------------|-------------------|-----------------------------------------------|-------------------------------------|-------------|---------|-----------------------------------|
| (Peigen & Jing 1997)C                 | 6       | Rats, Wistar                   | 200 - 250 g  | Male | 2.5                | 0.5                 | 4                 |                                               | Striatum                            | HPLC-UVD    | 60 min  | Chloral hydrate                   |
| (Perez-Pinzon <i>et al.</i> 1993)     | 4       | Rats, Sprague-Dawley           | 5 days       |      | 2                  | 0.24                | 3                 | Cuprophane, 6 kDa cut off, CMA 11             | Striatum                            | HPLC        | 20 min  | Pentobarbital                     |
| (Pinna <i>et al.</i> 2002)            | 14      | Rats, Sprague-Dawley           | 275 - 300 g  | Male | 3                  | 0.31                | 3                 | 12 kDa cut off, AN 69                         | Striatum                            | HPLC-FD     | 90 min  | Freely behaving                   |
| (Porkka-Heiskanen <i>et al.</i> 1997) | 6       | Cats                           |              |      |                    |                     |                   | CMA 10                                        | Basal Forebrain                     | HPLC-UVD    | None    | Freely behaving                   |
| (Porkka-Heiskanen <i>et al.</i> 2000) | 10      | Cats                           | Adult        | Male | 1.5                | 0.5                 | 2                 | Polycarbonate, 20 kDa cut off, CMA 10         | Substantia Innominata               | HPLC-UVD    | None    | Freely behaving                   |
| (Richter <i>et al.</i> 1999)          | 12      | Cats                           | 2.5 - 4.5 kg | Both | 2 or 4             | 0.5                 | 2                 |                                               | Ventral Medullary Respiratory Group | HPLC-UVD    | 90 min  | Sodium Pentobarbitone             |
| (Ruth <i>et al.</i> 1993)             | 12      | Pigs                           | < 5 days     |      | 2                  | 0.15                | 5                 | 8 kDa cut off, Clirans TH 10                  | Cortex                              | RP-HPLC     |         | Ketamine - Isoflurane             |
| (Savelyev <i>et al.</i> 2012)         | 16      | Rats, Wistar-Han               | 3 months     | Male | 1                  | 0.24                | 2                 | Cuprophane, 6 kDa cut off, CMA 11             | Basal Forebrain                     | HPLC-FD     | 60 min  | Freely behaving                   |
| (Scheller <i>et al.</i> 1996)         |         | Rats, Wistar                   | 230 - 260 g  | Male | 2                  |                     |                   |                                               | Cortex                              | HPLC        | 80 min  | Urethane                          |
| (Schulte <i>et al.</i> 2004)          | 28 - 32 | Mice, 129/OlaHsd/C57BL6 hybrid | 3 - 5 months | Male | 0.5                | 0.5                 | 2                 | Polyarylethersulphone, 20 kDa cut off, CMA 12 | Brain                               | HPLC-UVD    | None    | Fentanyl - Fluanisone - Midazolam |
| (Sciotti <i>et al.</i> 1992)          | 6       | Rats, Wistar                   | 300 - 500 g  | Male | 0.5                | 0.3                 | 5                 | 5 kDa cut off, Clirans TH 10                  | Caudate Nucleus                     | HPLC-UVD    | 90 min  | Sodium Thiamylal                  |
| (Sciotti <i>et al.</i> 1993a)A        | 5       | Rats, Wistar                   | 300 - 500 g  |      | 0.1                | 0.3                 | 5                 | 5 kDa cut off, Clirans TH 10                  | Caudate Nucleus                     |             | 90 min  | Ketamine - Xylazine               |
| (Sciotti <i>et al.</i> 1993a)B        | 8       | Rats, Wistar                   | 300 - 500 g  |      | 0.1                | 0.3                 | 5                 | 5 kDa cut off, Clirans TH 10                  | Caudate Nucleus                     |             | 90 min  | Ketamine - Xylazine               |
| (Sciotti & Van Wylen 1993b)           | 4       | Rats, Wistar                   | 300 - 500 g  | Male | 0.5                | 0.3                 | 5                 | 5 kDa cut off, Clirans TH 10                  | Caudate Nucleus                     | HPLC-UVD    | 90 min  | Thiamylal                         |
| (Sciotti & Van Wylen 1993c)A          | 4       | Rats, Wistar                   | 300 - 500 g  | Male | 0.5                | 0.3                 | 5                 | 5 kDa cut off, Clirans TH 10                  | Caudate Nucleus                     | RP-HPLC-UVD | 90 min  | Thiamylal                         |
| (Sciotti & Van Wylen 1993c)B          | 11      | Rats, Wistar                   | 300 - 500 g  | Male | 0.5                | 0.3                 | 5                 | 5 kDa cut off, Clirans TH 10                  | Caudate Nucleus                     | RP-HPLC-UVD | 90 min  | Thiamylal                         |

| Study Reference                             | N    | Species                                     | Age /weight              | Sex  | Flow rate ( $\mu\text{L}/\text{min}$ ) | Probe diameter (mm) | Probe length (mm) | Membrane                        | Location                  | Detection | Washout       | Anaesthesia during $\mu\text{D}$ |
|---------------------------------------------|------|---------------------------------------------|--------------------------|------|----------------------------------------|---------------------|-------------------|---------------------------------|---------------------------|-----------|---------------|----------------------------------|
| (Sharma <i>et al.</i> 2010a)                | 8(?) | Rats, Sprague-Dawley                        | 250 - 300 g              | Male | 0.7                                    | 0.22                | 2                 | CX-1-8-02                       | Basal Forebrain           | HPLC-UVD  | 12 - 16 hours | Freely behaving                  |
| (Skarphedinsson <i>et al.</i> 1989)         | 15   | Rats, Spontaneously Hypertensive Rats (SHR) | 250 - 350 g              | Male | 2.5                                    |                     |                   | CMA 10                          | Cortex                    | HPLC-UVD  | 1 hours       | Methohexital                     |
| (Slezia <i>et al.</i> 2004)                 | 21   | Rats, Sprague-Dawley                        | 250 - 300 g              | Male | 1                                      | 0.2                 | 3                 | 5 kDa cut off                   | Hippocampus               | HPLC-UVD  | 60 min        | Halothane                        |
| (Song <i>et al.</i> 2012)A                  | 8    | Rats, Sprague-Dawley                        | 295 - 355 g              | Male | 0.6                                    | 0.25                | 1                 |                                 | Ventral Tegmental Area    | RP-HPLC   | 80 min        | Freely behaving                  |
| (Song <i>et al.</i> 2012)B                  | 8    | Rats, Sprague-Dawley                        | 295 - 355 g              | Male | 1                                      | 0.25                | 1.5               |                                 | Nucleus Accumbens         | RP-HPLC   | 80 min        | Freely behaving                  |
| (Tominaga <i>et al.</i> 1992) (In Japanese) |      | Cats                                        |                          |      |                                        |                     |                   |                                 | Cortex                    | HPLC      |               |                                  |
| (Valtysson <i>et al.</i> 1998)              | 58   | Rats, Sprague-Dawley                        | 309 - 512 g              | Male | 2                                      | 0.5                 | 2                 | Polycarbonate-polyether, CMA 12 | Cortex                    | HPLC-UVD  | 60 min        | Halothane                        |
| (Van Wylen <i>et al.</i> 1986)              | 23   | Rats, Wistar                                | 300 - 500 g              | Male | 2                                      | 0.3                 | 5                 | 5 kDa cut off, Clirans TH 10    | Caudate Nucleus           | RP-HPLC   | 100 min       | Pentobarbital                    |
| (Watson <i>et al.</i> 1999)                 | 10   | Sheep, fetal                                | 120 days gestational age |      | 2                                      | 0.5                 | 2                 | CMA/12                          | Cortex                    | HPLC-UVD  | 1 hour        | Thiopental - Halothane           |
| (Wigren <i>et al.</i> 2007)                 | 8    | Rats, Wistar-Han                            | 300 - 400 g              | Male | 1                                      | 0.24                | 2                 | CMA/11                          | Basal Forebrain           | HPLC-UVD  | 30 - 90 min   | Freely behaving                  |
| (Yan <i>et al.</i> 1995)                    | 6    | Pigs, Yucatan miniature piglets             | 2.79 $\pm$ 0.14 kg       | Both | 2                                      | 0.5                 | 3                 | CMA/10                          | Nucleus Tractus Solitarii | HPLC-UVD  | 2 hours       | Ketamine - Xylazine              |
| (Zetterstrom <i>et al.</i> 1982)            |      | Rats, Sprague-Dawley                        | 250 - 300 g              | Male | 2                                      | 0.25                |                   | Cellulose, 5kDa cut off         | Caudate nucleus           | RP-HPLC   | 90 min        | Freely behaving                  |
| (Zhang & Niu 1994)                          | 4    | Rats, Wistar                                | 270 - 330 g              | Male | 2                                      |                     | 2                 |                                 | Striatum                  | HPLC-UVD  | 1 hour        | Chloral Hydrate                  |
| (Zhu <i>et al.</i> 2001)A                   | 3    | Rats, Sprague-Dawley                        | 350 - 450 g              | Male | 0.5                                    |                     | 4                 | MD-1001                         | Striatum                  | LC-MS/MS  |               | Freely behaving                  |
| (Zhu <i>et al.</i> 2001)B                   | 3    | Rats, Sprague-Dawley                        | 350 - 450 g              | Male | 0.3                                    |                     | 4                 | MD-1001                         | Cortex                    | LC-MS/MS  |               | Freely behaving                  |

Capital letters after the year of publication within the literature reference indicate separate subgroups within the same paper. Lower-case letters indicate separate papers.

FD = Fluorescent detection

HPLC = High Pressure Liquid Chromatography

LC = Liquid Chromatography

MS = Mass Spectrometry

RIA = RadiolImmunoAssay

RP = Reverse Phase

Spect = Spectrometry

UVD = UltraViolet Detection

**Appendix 2: Study characteristics of papers and abstracts not reporting absolute baseline adenosine concentrations or only reporting them in low-resolution figures**

| Study ID                          | N  | Species              | Age /weight  | Sex  | Flow rate ( $\mu\text{L}/\text{min}$ ) | Probe diameter (mm) | Probe length (mm) | Membrane                  | Location                                            | Detection   | Washout   | Anaesthesia during $\mu\text{D}$ |
|-----------------------------------|----|----------------------|--------------|------|----------------------------------------|---------------------|-------------------|---------------------------|-----------------------------------------------------|-------------|-----------|----------------------------------|
| (Battersby <i>et al.</i> 2009)    | 8  | Rats, Sprague-Dawley | Adult        | Male | 2                                      |                     |                   |                           | Substantia innominata                               | HPLC-UVD    |           | Isoflurane                       |
| (Bell <i>et al.</i> 1998)         | 15 | Rats, Sprague-Dawley | 300 - 400 g  | Male | 2                                      | 0.5                 | 2                 | CMA/12                    | Cortex                                              | HPLC        | 150 min   | Isoflurane                       |
| (Dohmen <i>et al.</i> 2005)       | 22 | Cats                 | 3.3 - 4.8 kg | Male | 2                                      | 0.5                 | 1                 |                           | Cortex                                              | HPLC-UVD    | < 2 hours | $\alpha$ -chloralose             |
| (Dworak <i>et al.</i> 2013)       |    | Rats, Sprague-Dawley |              | Male |                                        |                     |                   |                           | Basal Forebrain                                     | HPLC        |           |                                  |
| (Garrity <i>et al.</i> 2015)      | 3  | Rats, Sprague-Dawley | 250 - 350 g  | Male | 2                                      | 0.24                | 1                 | Cuprophane, 6 kDa cut off | Substantia innominata                               | HPLC-UVD    | 13 hours  | Freely behaving                  |
| (Gauthier <i>et al.</i> 2011)     | 10 | Rats, Sprague-Dawley | 250 - 350 g  | Male | 2                                      | 0.24                | 1                 | Cuprophane, 6 kDa cut off | Pontine Reticular Formation & Substantia Innominata | HPLC-UVD    | 120 min   | Isoflurane                       |
| (Golembiowska <i>et al.</i> 2011) |    | Rats                 |              |      |                                        |                     |                   |                           |                                                     | HPLC-Spect  |           |                                  |
| (Gvilia <i>et al.</i> 2014)       |    | Rats                 |              |      |                                        |                     |                   |                           | Basal Forebrain                                     |             |           |                                  |
| (Huang <i>et al.</i> 2011)        |    | Rats                 |              |      | 0.5                                    |                     | 4                 |                           | Striatum                                            | HPLC-UVD    | 90 min    | Chloral hydrate                  |
| (Huston <i>et al.</i> 1996)       | 13 | Rats, Wistar         | 250 - 300 g  | Male | 2                                      | 0.25                | 4                 | Cellulose                 | Striatum                                            | RIA         | 24 hours  | Freely behaving                  |
| (Ikeda <i>et al.</i> 2005)        | 12 | Rats, Sprague-Dawley | 300 - 450 g  | Male | 2                                      |                     | 2                 |                           | Hypothalamus                                        | HPLC-UVD    | 60 min    | Sodium pentobarbital             |
| (Kaiser & During 1995)            | 4  | Rats, Sprague-Dawley | 250 - 350 g  | Male | 2.5                                    |                     | 2                 | Cellulose, 5kDa cut off   | Hippocampus                                         | HPLC-UVD    | 30 min    | $\alpha$ -chloralose             |
| (Kalinchuk <i>et al.</i> 2003)    |    | Rats                 | 300 - 400 g  | Male | 1                                      | 0.24                |                   | Cuprophane, 6 kDa cut off | Basal forebrain                                     | HPLC-UVD    | 3 hours   | Freely behaving                  |
| (Kalinchuk <i>et al.</i> 2008)    | 6  | Rats, Wistar         | 300 - 400 g  | Male | 1                                      | 0.24                | 2                 | Cuprophane, 6 kDa cut off | Basal forebrain                                     | HPLC-UVD    | 20 hours  | Freely behaving                  |
| (Kalinchuk <i>et al.</i> 2010)    |    | Rats                 |              | Male |                                        |                     |                   |                           | Basal forebrain                                     |             |           |                                  |
| (Kalinchuk <i>et al.</i> 2012)    |    | Rats                 |              | Male |                                        |                     |                   |                           | Basal Forebrain & Cortex                            | HPLC        |           |                                  |
| (Kalinchuk <i>et al.</i> 2013)    |    | Rats                 |              | Male |                                        |                     |                   |                           | Basal Forebrain                                     |             |           |                                  |
| (Kitagawa <i>et al.</i> 2002)     | 7  | Rats, Wistar         | 250 - 300 g  | Male | 2                                      |                     | 2                 | A-1-4-02                  | Striatum                                            | RP-HPLC-UVD | None      | Halothane                        |
| (Lazar <i>et al.</i> 2012)        |    | Rats, Sprague-Dawley |              |      |                                        |                     |                   |                           |                                                     | HPLC-UVD    |           |                                  |



| Study ID                                 | N  | Species                     | Age /weight                      | Sex  | Flow rate ( $\mu\text{L}/\text{min}$ ) | Probe diameter (mm) | Probe length (mm) | Membrane                                      | Location                                                               | Detection  | Washout     | Anaesthesia during $\mu\text{D}$ |
|------------------------------------------|----|-----------------------------|----------------------------------|------|----------------------------------------|---------------------|-------------------|-----------------------------------------------|------------------------------------------------------------------------|------------|-------------|----------------------------------|
| (Matsumoto <i>et al.</i> 1993)           | 18 | Cats                        | 2.5 - 3.6 kg                     | Both | 2                                      | 0.5                 | 1                 |                                               | Cortex                                                                 | HPLC-UVD   | 2 - 4 hours | Ketamine - Halothane             |
| (McKenna <i>et al.</i> 2007)             | 60 | Rats, Sprague-Dawley        | 280 - 350 g                      | Male | 1.5 $\text{Hl}/\text{m in}$            | 0.24                | 2                 | Cuprophane, 6 kDa cut off                     | Nucleus Accumbens, Ventral Pallidum, Caudate Putamen & Basal Forebrain | HPLC-UVD   | 16 hours    | Freely behaving                  |
| (Mongan <i>et al.</i> 2001)              | 24 | Pigs                        | $\pm$ 32 kg                      |      | 2                                      | 0.5                 | 4                 | Polycarbonate, 20 kDa cut off, CMA 10         | Cortex                                                                 | RP-HPLC    |             | Halothane                        |
| (Murillo-Rodriguez <i>et al.</i> 2003)   | 6  | Rats, F344                  | 3 months                         | Male | 0.25                                   | 0.34                | 1                 | Polyacrylonitrile, 30 kDa cut off             | Basal forebrain                                                        | HPLC-UVD   | 6 - 7 hours | Freely behaving                  |
| (Noworyta-Sokolowska <i>et al.</i> 2013) |    | Rats, Wistar-Han            | 280 - 350 g                      | Male | 2                                      |                     |                   |                                               | Striatum                                                               | RP-HPLC-FD | 30 min      | Ketamine - Xylazine              |
| (Ramesh <i>et al.</i> 2009)              |    | Mice, ENT1-null             |                                  |      |                                        |                     |                   |                                               | Basal Forebrain                                                        | HPLC       |             |                                  |
| (Rodriguez <i>et al.</i> 2005)           | 12 | Rats, Albino Sprague-Dawley | 250 - 300 g                      | Male | 2                                      | 0.5                 |                   | CMA 12                                        | Hippocampus                                                            | HPLC-UVD   | 12.5 hours  | Equithesin                       |
| (Sharma <i>et al.</i> 2010b)             | 7  | Rats, Sprague-Dawley        | 200 - 400 g                      | Male | 0.7                                    |                     | 2                 | CX-1-8-02                                     | Basal Forebrain                                                        | HPLC-UVD   | 16 hours    | Freely behaving                  |
| (Vazquez-DeRose <i>et al.</i> 2014)      | 60 | Rats, Sprague-Dawley        | 200 - 250 g                      | Male | 1                                      | 0.5                 | 2                 | Polyarylethersulphone, 20 kDa cut off, CMA 12 | Cortex & other                                                         | HPLC-UVD   | 18 hours    | Freely behaving                  |
| (Verrier <i>et al.</i> 2012)A            | 12 | Mice, C57BL/6               |                                  |      | 2                                      | 0.5                 | 2                 | CMA/12                                        | Gray & white matter                                                    | RP-HPLC-MS | 60 min      | Isoflurane - N20                 |
| (Watson <i>et al.</i> 2002)              | 10 | Sheep, fetal, mixed breed   | 133 $\pm$ 1 days gestational age | Both | 2                                      | 0.5                 | 2                 | CMA 12                                        | Cortex                                                                 | HPLC-UVD   |             | Freely behaving                  |
| (Wigren <i>et al.</i> 2012)              | 24 | Mice, C57BL/6               |                                  |      |                                        |                     |                   |                                               | Basal Forebrain                                                        |            |             |                                  |
| (Wigren <i>et al.</i> 2014)              | 24 | Mice, C57BL/6               |                                  |      |                                        |                     |                   |                                               | Basal Forebrain                                                        |            |             |                                  |

FD = Fluorescent detection

HPLC = High Pressure Liquid Chromatography

MS = Mass Spectrometry

RIA = RadiolImmunoAssay

RP = Reverse Phase

Spect = Spectrometry

UVD = UltraViolet Detection

**Appendix 3: AMP concentrations and corresponding study characteristics**

| Study ID               | N | Species              | Age /weight | Sex  | Flow rate (µL/min) | Probe diameter (mm) | Probe length (mm) | Membrane | Location     | Detection  | Washout | Anaesthesia during µID | AMP (nM) | SEM |
|------------------------|---|----------------------|-------------|------|--------------------|---------------------|-------------------|----------|--------------|------------|---------|------------------------|----------|-----|
| (Ballarin et al. 1989) | 6 | Rats, Sprague-Dawley | 180 - 200 g | Male | 2                  |                     | 4                 |          | Striatum     | HPLC-UVD   | None    | Freely behaving        | 930      | 90  |
| (Verrier et al. 2012)A | 6 | Mice, C57BL/6        |             |      | 2                  | 0.5                 | 2                 | CMA/12   | Gray matter  | RP-HPLC-MS | 60 min  | Isoflurane - N20       | 14       |     |
| (Verrier et al. 2012)B | 6 | Mice, C57BL/6        |             |      | 2                  | 0.5                 | 2                 | CMA/12   | White matter | RP-HPLC-MS | 60 min  | Isoflurane - N20       | 69       | 41  |

Capitals after the study-ID year indicate separate subgroups within the same paper.

## References with appendices

- Aden, U., O'Connor, W. T. and Berman, R. F. (2004) Changes in purine levels and adenosine receptors in kindled seizures in the rat. *Neuroreport*, **15**, 1585-1589.
- Andine, P., Rudolph, K. A., Fredholm, B. B. and Hagberg, H. (1990) Effect of propentofylline (HWA 285) on extracellular purines and excitatory amino acids in CA1 of rat hippocampus during transient ischaemia. *Br J Pharmacol*, **100**, 814-818.
- Ballarin, M., Fredholm, B. B., Ambrosio, S. and Mahy, N. (1991) Extracellular levels of adenosine and its metabolites in the striatum of awake rats: inhibition of uptake and metabolism. *Acta Physiol Scand*, **142**, 97-103.
- Ballarin, M., Herrera-Marschitz, M., Casas, M. and Ungerstedt, U. (1987) Striatal adenosine levels measured 'in vivo' by microdialysis in rats with unilateral dopamine denervation. *Neuroscience Letters*, **83**, 338-344.
- Ballarin, M., Reiriz, J., Ambrosio, S., Camps, M., Blesa, R. and Mahy, N. (1989) Acute effects of 1-methyl-1,4-phenylpyridinium ion (MPP<sup>+</sup>) on purine metabolism in rat striatum studied in vivo using the microdialysis technique. *Brain Research*, **483**, 184-187.
- Basheer, R., Porkka-Heiskanen, T., Stenberg, D. and McCarley, R. W. (1999) Adenosine and behavioral state control: adenosine increases c-Fos protein and AP1 binding in basal forebrain of rats. *Molecular Brain Research*, **73**, 1-10.
- Battersby, A. S., Guzick, S. E., Baghdoyan, H. A. and Lydic, R. (2009) Microdialysis delivery of morphine decreases adenosine levels in rat basal forebrain and coadministration of an adenosine deaminase inhibitor reverses the morphine-induced decrease. *Sleep*, **32**, A6.
- Bell, M. J., Kochanek, P. M., Carcillo, J. A. et al. (1998) Interstitial adenosine, inosine, and hypoxanthine are increased after experimental traumatic brain injury in the rat. *Journal of Neurotrauma*, **15**, 163-170.
- Bennett, H. J., White, T. D. and Semba, K. (2000) Activation of metabotropic glutamate receptors increases extracellular adenosine in vivo. *Neuroreport*, **11**, 3489-3492.
- Bennett, H. J., White, T. D. and Semba, K. (2003) Activation of cholinergic and adrenergic receptors increases the concentration of extracellular adenosine in the cerebral cortex of unanesthetized rat. *Neuroscience*, **117**, 119-127.
- Berman, R. F., Fredholm, B. B., Aden, U. and O'Connor, W. T. (2000) Evidence for increased dorsal hippocampal adenosine release and metabolism during pharmacologically induced seizures in rats. *Brain Research*, **872**, 44-53.
- Blanco-Centurion, C., Xu, M., Murillo-Rodriguez, E., Gerashchenko, D., Shiromani, A. M., Salin-Pascual, R. J., Hof, P. R. and Shiromani, P. J. (2006) Adenosine and sleep homeostasis in the basal forebrain. *Journal of Neuroscience*, **26**, 8092-8100.
- Britton, D. R., Mikusa, J., Lee, C. H., Jarvis, M. F., Williams, M. and Kowaluk, E. A. (1999) Site and event specific increase of striatal adenosine release by adenosine kinase inhibition in rats. *Neuroscience Letters*, **266**, 93-96.
- Butcher, S. P., Hagberg, H., Sandberg, M. and Hamberger, A. (1987) Extracellular purine catabolite and amino acid levels in the rat striatum during severe hypoglycemia: Effects of 2-amino-5-phosphonovalerate. *Neurochemistry International*, **11**, 95-99.
- Carrozzo, M. M., Troisi, L., Cannazza, G., Cazzato, A. S., Braghieroli, D., Parenti, C., Guiducci, S. and Zoli, M. (2012) An improved LC-S/MS method for the quantitation of adenosine concentration in mice brain microdialysates. *Journal of Pharmaceutical and Biomedical Analysis*, **70**, 563-566.
- Carswell, H. V., Graham, D. I. and Stone, T. W. (1997) Kainate-evoked release of adenosine from the hippocampus of the anaesthetised rat: Possible involvement of free radicals. *Journal of Neurochemistry*, **68**, 240-247.
- Chen, L. S., Fujitaki, J. and Dixon, R. (1993) An improved assay for adenosine in rat brain microdialysates using microbore high performance liquid chromatography. *Journal of Liquid Chromatography*, **16**, 2791-2796.
- Chen, Y., Graham, D. I. and Stone, T. W. (1992) Release of endogenous adenosine and its metabolites by the activation of NMDA receptors in the rat hippocampus in vivo. *Br J Pharmacol*, **106**, 632-638.
- Chen, Y. and Stone, T. W. (1991) Release of endogenous adenosine and related purines from the rat hippocampus in vivo. *Br J Pharmacol*, **Proceedings of the British Pharmacological Society Meeting**, 76P.
- Cui, M., Bai, X., Li, T., Chen, F., Dong, Q., Zhao, Y. and Liu, X. (2013) Decreased extracellular adenosine levels lead to loss of hypoxia-induced neuroprotection after repeated episodes of exposure to hypoxia. *PLoS One*, **8**, e57065.
- Cui, M., Ding, H., Chen, F., Zhao, Y., Yang, Q. and Dong, Q. (2016) Mdivi-1 Protects Against Ischemic Brain Injury via Elevating Extracellular Adenosine in a cAMP/CREB-CD39-Dependent Manner. *Molecular Neurobiology*, **53**, 240-253.
- Deng, Q., Watson, C. J. and Kennedy, R. T. (2003) Aptamer affinity chromatography for rapid assay of adenosine in microdialysis samples collected in vivo. *Journal of Chromatography A*, **1005**, 123-130.
- Dobolyi, A., Reichart, A., Szikra, T. and Juhasz, G. (1997) Purine and pyrimidine nucleoside content of the neuronal extracellular space in rat - An in vivo microdialysis study. In: *Purine and Pyrimidine Metabolism in Man Ix*, (A. Griesmacher, P. Chiba and M. M. Muller eds.), Vol. 431, pp. 83-87.

- Dobolyi, A., Reichart, A., Szikra, T., Nyitrai, G., Kekesi, K. A. and Juhasz, G. (2000) Sustained depolarisation induces changes in the extracellular concentrations of purine and pyrimidine nucleosides in the rat thalamus. *Neurochemistry International*, **37**, 71-79.
- Dobolyi, A., Reichart, A., Szikra, T., Szilagyi, N., Kekesi, A. K., Karancsi, T., Slegel, P., Palkovits, M. and Juhasz, G. (1998) Analysis of purine and pyrimidine bases, nucleosides and deoxynucleosides in brain microsamples (microdialysates and micropunches) and cerebrospinal fluid. *Neurochemistry International*, **32**, 247-256.
- Dobolyi, A., Szikra, T., Kekesi, A. K., Kovacs, Z. and Juhasz, G. (1999) Uridine is released by depolarization and inhibits unit activity in the rat hippocampus. *Neuroreport*, **10**, 3049-3053.
- Dohmen, C., Kumura, E., Rosner, G., Heiss, W. D. and Graf, R. (2001) Adenosine in relation to calcium homeostasis: Comparison between gray and white matter ischemia. *Journal of Cerebral Blood Flow and Metabolism*, **21**, 503-510.
- Dohmen, C., Kumura, E., Rosner, G., Heiss, W. D. and Graf, R. (2005) Extracellular correlates of glutamate toxicity in short-term cerebral ischemia and reperfusion: A direct in vivo comparison between white and gray matter. *Brain Research*, **1037**, 43-51.
- Dux, E., Fastbom, J., Ungerstedt, U., Rudolphi, K. and Fredholm, B. B. (1990) Protective effect of adenosine and a novel xanthine derivative propentofylline on the cell damage after bilateral carotid occlusion in the gerbil hippocampus. *Brain Research*, **516**, 248-256.
- Dworak, M., Kim, T., McCarley, R. W. and Basheer, R. (2013) Reduced homeostatic sleep pressure and accompanied changes in brain energetic after oral creatine-supplementation in rats. *Somnologie*, **17**, 62.
- Fu, X. Y., Zhang, Z. D., Liang, K. et al. (2015) Subclavian steal syndrome decreases neurogenesis in the cerebellar cortex and affects cognitive function in rabbits. *Experimental and Therapeutic Medicine*, **10**, 1455-1459.
- Garrity, A. G., Botta, S., Lazar, S. B., Swor, E., Vanini, G., Baghdoyan, H. A. and Lydic, R. (2015) Dexmedetomidine-Induced Sedation Does Not Mimic the Neurobehavioral Phenotypes of Sleep in Sprague Dawley Rat. *Sleep*, **38**, 73-84.
- Gauthier, E. A., Guzick, S. E., Brummett, C. M., Baghdoyan, H. A. and Lydic, R. (2011) Buprenorphine Disrupts Sleep and Decreases Adenosine Concentrations in Sleep-regulating Brain Regions of Sprague Dawley Rat. *Anesthesiology*, **115**, 743-753.
- Gianfriddo, M., Corsi, C., Melani, A., Pezzola, A., Reggio, R., Popoli, P. and Pedata, F. (2003) Adenosine A(2A) antagonism increases striatal glutamate outflow in the quinolinic acid rat model of Huntington's disease. *Brain Research*, **979**, 225-229.
- Gianfriddo, M., Melani, A., Turchi, D., Giovannini, M. G. and Pedata, F. (2004) Adenosine and glutamate extracellular concentrations and mitogen-activated protein kinases in the striatum of Huntington transgenic mice. Selective antagonism of adenosine A(2A) receptors reduces transmitter outflow. *Neurobiology of Disease*, **17**, 77-88.
- Gidday, J. M., Kim, Y. B., Shah, A. R., Gonzales, E. R. and Park, T. S. (1996) Adenosine transport inhibition ameliorates postischemic hypoperfusion in pigs. *Brain Research*, **734**, 261-268.
- Golembiowska, K., Kaminska, K., Gawlik, M. and Noworyta-Sokolowska, K. (2011) Lipopolysaccharide-induced oxidative stress in rat striatum. *European Neuropsychopharmacology*, **21**, S273-S274.
- Grabb, M. C., Sciotti, V. M., Gidday, J. M., Cohen, S. A. and Van Wylen, D. G. L. (1998) Neurochemical and morphological responses to acutely and chronically implanted brain microdialysis probes. *Journal of Neuroscience Methods*, **82**, 25-34.
- Gvilia, I., Kalinchuk, A., Basheer, R. and Szymusiak, R. (2014) Changes in adenosine signaling in the basal forebrain during post-natal development. *Sleep*, **37**, A92.
- Hagberg, H., Andersson, P. and Lacarewicz, J. (1987) Extracellular adenosine, inosine, hypoxanthine, and xanthine in relation to tissue nucleotides and purines in rat striatum during transient ischemia. *Journal of Neurochemistry*, **49**, 227-231.
- Headrick, J. P., Bendall, M. R., Faden, A. I. and Vink, R. (1994) Dissociation of adenosine levels from bioenergetic state in experimental brain trauma: Potential role in secondary injury. *Journal of Cerebral Blood Flow and Metabolism*, **14**, 853-861.
- Herrera-Marschitz, M., Luthman, J. and Ferre, S. (1994) Unilateral neonatal intracerebroventricular 6-hydroxydopamine administration in rats: II. Effects on extracellular monoamine, acetylcholine and adenosine levels monitored with in vivo microdialysis. *Psychopharmacology*, **116**, 451-456.
- Hillered, L., Hallstrom, A., Segersvard, S., Persson, L. and Ungerstedt, U. (1989) Dynamics of extracellular metabolites in the striatum after middle cerebral artery occlusion in the rat monitored by intracerebral microdialysis. *Journal of Cerebral Blood Flow and Metabolism*, **9**, 607-616.
- Huang, N. K., Lin, J. H., Lin, J. T. et al. (2011) A new drug design targeting the adenosinergic system for Huntington's disease. *PLoS One*, **6**, e20934.
- Huston, J. P., Haas, H. L., Boix, F., Pfister, M., Decking, U., Schrader, J. and Schwarting, R. K. W. (1996) Extracellular adenosine levels in neostriatum and hippocampus during rest and activity periods of rats. *Neuroscience*, **73**, 99-107.
- Ikeda, M., Ikeda-Sagara, M., Okada, T. et al. (2005) Brain oxidation is an initial process in sleep induction. *Neuroscience*, **130**, 1029-1040.
- Kaiser, M. G. and During, M. J. (1995) Combining laser doppler flowmetry with microdialysis: A novel approach to investigate the coupling of regional cerebral blood flow to neuronal activity. *Journal of Neuroscience Methods*, **60**, 165-173.
- Kaku, T., Hada, J. and Hayashi, Y. (1994) Endogenous adenosine exerts inhibitory effects upon the development of spreading depression and glutamate release induced by microdialysis with high K<sup>+</sup> in rat hippocampus. *Brain Res*, **658**, 39-48.
- Kaku, T., Jiang, M. H., Hada, J., Morimoto, K. and Hayashi, Y. (2001) Sodium nitroprusside-induced seizures, Y. and adenosine release in rat hippocampus. *European Journal of Pharmacology*, **413**, 199-205.

- Kalinchuk, A., Kim, S., McCarley, R. W. and Basheer, R. (2012) The role of cholinergic basal forebrain neurons in the biochemical and electrophysiological changes in the cortex during sleep deprivation. *Sleep*, **35**, A4-A5.
- Kalinchuk, A., McCarley, R. W., Porkka-Heiskanen, T. and Basheer, R. (2010) Time course of changes in adenosine, nitric oxide (NO) and inducible no synthase (iNOS) during prolonged sleep deprivation in the basal forebrain and cortex. *Sleep*, **33**, A53.
- Kalinchuk, A., Porkka-Heiskanen, T., McCarley, R. W. and Basheer, R. (2013) The basal forebrain cholinergic cells are important for the regulation of biochemical and electrophysiological mechanisms underlying sleep homeostasis. *Sleep*, **36**, A5.
- Kalinchuk, A. V., McCarley, R. W., Porkka-Heiskanen, T. and Basheer, R. (2011) The time course of adenosine, nitric oxide (NO) and inducible NO synthase changes in the brain with sleep loss and their role in the non-rapid eye movement sleep homeostatic cascade. *Journal of Neurochemistry*, **116**, 260-272.
- Kalinchuk, A. V., McCarley, R. W., Stenberg, D., Porkka-Heiskanen, T. and Basheer, R. (2008) The Role of Cholinergic Basal Forebrain Neurons in Aadenosine-Mediated Homeostatic Control of Sleep: Lessons from 192 IGG-Saporin Lesions. *Neuroscience*, **157**, 238-253.
- Kalinchuk, A. V., Urrila, A. S., Alanko, L., Heiskanen, S., Wigren, H. K., Suomela, M., Stenberg, D. and Porkka-Heiskanen, T. (2003) Local energy depletion in the basal forebrain increases sleep. *Eur J Neurosci*, **17**, 863-869.
- Kim, T., Vijay, R., Kalinchuk, A., Messing, R. O., Choi, D., Dworak, M., McCarley, R. W. and Basheer, R. (2010) Sleep-wake regulation in type 1 equilibrative nucleoside transporter knockout mice. *Sleep*, **33**, A14.
- Kitagawa, H., Mori, A., Shimada, J., Mitsumoto, Y. and Kikuchi, T. (2002) Intracerebral adenosine infusion improves neurological outcome after transient focal ischemia in rats. *Neurological Research*, **24**, 317-323.
- Kjellmer, I., Andine, P., Hagberg, H. and Thiringer, K. (1989) Extracellular increase of hypoxanthine and xanthine in the cortex and basal ganglia of fetal lambs during hypoxia-ischemia. *Brain Res*, **478**, 241-247.
- Kondoh, S., Nagasawa, S., Kawanishi, M., Yamaguchi, K., Kajimoto, S. and Ohta, T. (1999) Effects of ebselen on cerebral ischemia and reperfusion evaluated by microdialysis. *Neurological Research*, **21**, 682-686.
- Koos, B. J., Kruger, L. and Murray, T. F. (1997) Source of extracellular brain adenosine during hypoxia in fetal sheep. *Brain Research*, **778**, 439-442.
- Lazar, S. B., Garrity, A. G., Mashour, G. A., Baghdoyan, H. A. and Lydic, R. (2012) Dexmedetomidine, adenosine, and sleep: Convergence or conflation? *British Journal of Anaesthesia*, **108** (2), 348P.
- Lehmann, A., Hagberg, H., Huxtable, R. J. and Sandberg, M. (1987) Reduction of brain taurine: Effects on neurotoxic and metabolic actions of kainate. *Neurochemistry International*, **10**, 265-274.
- Li, H., Yan, Z., Zhu, J., Yang, J. and He, J. (2011) Neuroprotective effects of resveratrol on ischemic injury mediated by improving brain energy metabolism and alleviating oxidative stress in rats. *Neuropharmacology*, **60**, 252-258.
- Lutz, P. L. and Kabler, S. (1997) Release of adenosine and ATP in the brain of the freshwater turtle (*Trachemys scripta*) during long-term anoxia. *Brain Research*, **769**, 281-286.
- Lydic, R., Guzick, S., Brummett, C. and Baghdoyan, H. (2010) Microdialysis delivery of buprenorphine to rat pontine reticular formation does not alter adenosine levels. *Journal of Pain*, **1**, S32.
- Masana, Y., Morimoto, K., Hayakawa, T., Shimizu, H., Shimada, N., Nii, Y., Yoshimine, T., Mogami, H. and Hashimoto, T. (1989) [Extracellular purine catabolites and tissue nucleotides and purine catabolites during progression and recovery of ischemia]. *No To Shinkei*, **41**, 687-693.
- Materi, L. M. and Semba, K. (2001) Inhibition of synaptically evoked cortical acetylcholine release by intracortical glutamate: involvement of GABAergic neurons. *European Journal of Neuroscience*, **14**, 38-46.
- Matsumoto, K., Graf, R., Rosner, G., Shimada, N. and Heiss, W. D. (1992) Flow thresholds for extracellular purine catabolite elevation in cat focal ischemia. *Brain Research*, **579**, 309-314.
- Matsumoto, K., Graf, R., Rosner, G., Taguchi, J. and Heiss, W. D. (1993) Elevation of neuroactive substances in the cortex of cats during prolonged focal ischemia. *Journal of Cerebral Blood Flow and Metabolism*, **13**, 586-594.
- Maysinger, D., Herrera-Marschitz, M., Gojny, M., Ungerstedt, U. and Cuello, A. C. (1992) Effects of nerve growth factor on cortical and striatal acetylcholine and dopamine release in rats with cortical devascularizing lesions. *Brain Research*, **577**, 300-305.
- McKenna, J. T., Tartar, J. L., Ward, C. P., Thakkar, M. M., Cordeira, J. W., McCarley, R. W. and Strecker, R. E. (2007) Sleep fragmentation elevates behavioral, electrographic and neurochemical measures of sleepiness. *Neuroscience*, **146**, 1462-1473.
- Melani, A., Corsi, C., Gimenez-Llort, L., Martinez, E., Ogren, S. O., Pedata, F. and Ferre, S. (1999b) Effect of N-methyl-D-aspartate on motor activity and in vivo adenosine striatal outflow in the rat. *European Journal of Pharmacology*, **385**, 15-19.
- Melani, A., Corti, F., Stephan, H., Muller, C. E., Donati, C., Bruni, P., Vannucchi, M. G. and Pedata, F. (2012) Ecto-ATPase inhibition: ATP and adenosine release under physiological and ischemic in vivo conditions in the rat striatum. *Experimental Neurology*, **233**, 193-204.

- Melani, A., Pantoni, L., Bordoni, F., Gianfriddo, M., Bianchi, L., Vannucchi, M. G., Bertorelli, R., Monopoli, A. and Pedata, F. (2003) The selective A(2A) receptor antagonist SCH 58261 reduces striatal transmitter outflow, turning behavior and ischemic brain damage induced by permanent focal ischemia in the rat. *Brain Research*, **959**, 243-250.
- Melani, A., Pantoni, L., Corsi, C., Bianchi, L., Monopoli, A., Bertorelli, R., Pepeu, G. and Pedata, F. (1999a) Striatal outflow of adenosine, excitatory amino acids, gamma-aminobutyric acid, and taurine in awake freely moving rats after middle cerebral artery occlusion: correlations with neurological deficit and histopathological damage. *Stroke*, **30**, 2448-2454; discussion 2455.
- Mijangos-Moreno, S., Poot-Ake, A., Arankowsky-Sandoval, G. and Murillo-Rodriguez, E. (2014) Intrahypothalamic injection of cannabidiol increases the extracellular levels of adenosine in nucleus accumbens in rats. *Neuroscience research*, **84**, 60-63.
- Mijangos-Moreno, S., Poot-Ake, A., Guzman, K., Arankowsky-Sandoval, G., Arias-Carrion, O., Zaldivar-Rae, J., Sarro-Ramirez, A. and Murillo-Rodriguez, E. (2015) Sleep and neurochemical modulation by the nuclear peroxisome proliferator-activated receptor alpha (PPAR-alpha) in rat. *Neurosci Res*.
- Miranda, M. F., Hamani, C., de Almeida, A. C. et al. (2014) Role of adenosine in the antiepileptic effects of deep brain stimulation. *Front Cell Neurosci*, **8**, 312.
- Mongan, P. D., Capacchione, J., Fontana, J. L., West, S. and Bunger, R. (2001) Pyruvate improves cerebral metabolism during hemorrhagic shock. *American Journal of Physiology-Heart and Circulatory Physiology*, **281**, H854-H864.
- Morimoto, K., Shimizu, H., Hayakawa, T., Shimada, N., Nii, Y., Masana, Y., Kato, A. and Mogami, H. (1991) Purine catabolites in cerebral interstitial fluid during progression of and recovery from ischemia. *Neurol Med Chir (Tokyo)*, **31**, 129-134.
- Moss, I. R., Yan, S., Lafriere, A. and Zhang, C. (1995) Microdialyzed Enkephalin and Adenosine, Breathing and Hypoxia in Developing Swine. *Faseb Journal*, **9**, A666-A666.
- Murillo-Rodriguez, E., Blanco-Centurion, C., Gerashchenko, D., Salin-Pascual, R. J. and Shiromani, P. J. (2004) The diurnal rhythm of adenosine levels in the basal forebrain of young and old rats. *Neuroscience*, **123**, 361-370.
- Murillo-Rodriguez, E., Blanco-Centurion, C., Sanchez, C., Piomelli, D. and Shiromani, P. J. (2003) Anandamide enhances extracellular levels of adenosine and induces sleep: An in vivo Microdialysis study. *Sleep*, **26**, 943-947.
- Murillo-Rodriguez, E., Liu, M., Blanco-Centurion, C. and Shiromani, P. J. (2008) Effects of hypocretin (orexin) neuronal loss on sleep and extracellular adenosine levels in the rat basal forebrain. *European Journal of Neuroscience*, **28**, 1191-1198.
- Nagel, J. and Hauber, W. (2002) Effects of salient environmental stimuli on extracellular adenosine levels in the rat nucleus accumbens measured by in vivo microdialysis. *Behavioural brain research*, **134**, 485-492.
- Nagel, J. and Hauber, W. (2004) Reverse microdialysis of a dopamine D-2 receptor antagonist alters extracellular adenosine levels in the rat nucleus accumbens. *Neurochemistry International*, **44**, 609-615.
- Nelson, A. M., Battersby, A. S., Baghdoyan, H. A. and Lydic, R. (2009) Opioid-induced decreases in rat brain adenosine levels are reversed by inhibiting adenosine deaminase. *Anesthesiology*, **111**, 1327-1333.
- Nilsson, P., Hillered, L., Ponten, U. and Ungerstedt, U. (1990) Changes in cortical extracellular levels of energy-related metabolites and amino acids following concussive brain injury in rats. *Journal of Cerebral Blood Flow and Metabolism*, **10**, 631-637.
- Nomoto, M., Kaseda, S., Iwata, S., Shimizu, T., Fukuda, T. and Nakagawa, S. (2000) The metabolic rate and vulnerability of dopaminergic neurons, and adenosine dynamics in the cerebral cortex, nucleus accumbens, caudate nucleus, and putamen of the common marmoset. *Journal of Neurology, Supplement*, **247**, V16-V22.
- Nomoto, M., Shimizu, T., Iwata, S., Kaseda, S. and Fukuda, T. (1999) Metabolism of adenosine increase in the striatum in common marmoset parkinsonism induced by MPTP. *Advances in neurology*, **80**, 125-128.
- Northington, F. J., Matherne, G. P., Coleman, S. D. and Berne, R. M. (1992) Sciatic nerve stimulation does not increase endogenous adenosine production in sensory-motor cortex. *Journal of Cerebral Blood Flow and Metabolism*, **12**, 835-843.
- Noworyta-Sokolowska, K., Gorska, A. and Golembiowska, K. (2013) LPS-induced oxidative stress and inflammatory reaction in the rat striatum. *Pharmacological Reports*, **65**, 863-869.
- Okada, T., Mochizuki, T., Huang, Z. L., Eguchi, N., Sugita, Y., Urade, Y. and Hayaishi, O. (2003) Dominant localization of adenosine deaminase in leptomeninges and involvement of the enzyme in sleep. *Biochemical and Biophysical Research Communications*, **312**, 29-34.
- Park, T. S., Van Wylen, D. G., Rubio, R. and Berne, R. M. (1988) Brain interstitial adenosine and sagittal sinus blood flow during systemic hypotension in piglet. *J Cereb Blood Flow Metab*, **8**, 822-828.
- Pazzagli, M., Corsi, C., Fratti, S., Pedata, F. and Pepeu, G. (1995) Regulation of extracellular adenosine levels in the striatum of aging rats. *Brain Res*, **684**, 103-106.
- Pazzagli, M., Corsi, C., Latini, S., Pedata, F. and Pepeu, G. (1994) In vivo regulation of extracellular adenosine levels in the cerebral cortex by NMDA and muscarinic receptors. *European Journal of Pharmacology*, **254**, 277-282.
- Pazzagli, M., Pedata, F. and Pepeu, G. (1993) Effect of K<sup>+</sup> depolarization, tetrodotoxin, and NMDA receptor inhibition on extracellular adenosine levels in rat striatum. *Eur J Pharmacol*, **234**, 61-65.
- Peigen, K. and Jing, S. (1997) The in vivo changes of extracellular fluid adenosine on brain ischemia/reperfusion and the effects of batroxobin on these changes in rats. [Chinese]. *Chinese Journal of Neurology*, **30**, 165-168.

- Perez-Pinzon, M. A., Nilsson, G. E. and Lutz, P. L. (1993) Relationship between ion gradients and neurotransmitter release in the newborn rat striatum during anoxia. *Brain Research*, **602**, 228-233.
- Pinna, A., Corsi, C., Carta, A. R., Valentini, V., Pedata, F. and Morelli, M. (2002) Modification of adenosine extracellular levels and adenosine A(2A) receptor mRNA by dopamine denervation. *European Journal of Pharmacology*, **446**, 75-82.
- Porkka-Heiskanen, T., Strecker, R. E. and McCarley, R. W. (2000) Brain site-specificity of extracellular adenosine concentration changes during sleep deprivation and spontaneous sleep: An in vivo microdialysis study. *Neuroscience*, **99**, 507-517.
- Porkka-Heiskanen, T., Strecker, R. E., Thakkar, M., Bjorkum, A. A., Greene, R. W. and McCarley, R. W. (1997) Adenosine: A mediator of the sleep-inducing effects of prolonged wakefulness. *Science*, **276**, 1265-1267.
- Ramesh, V., Kalinchuk, A. V., Messing, R. O., Choi, D., Dworak, M., McCarley, R. W. and Basheer, R. (2009) Compensatory changes in nucleoside transporters and sleep-wake pattern in type 1 equilibrative nucleoside transporter knockout mice. *Sleep*, **32**, A157-A158.
- Richter, D. W., Schmidt-Garcon, P., Pierrefiche, O., Bischoff, A. M. and Lalley, P. M. (1999) Neurotransmitters and neuromodulators controlling the hypoxic respiratory response in anaesthetised cats. *Journal of Physiology*, **514**, 567-578.
- Rodriguez, M. J., Robledo, P., Andrade, C. and Mahy, N. (2005) In vivo co-ordinated interactions between inhibitory systems to control glutamate-mediated hippocampal excitability. *Journal of Neurochemistry*, **95**, 651-661.
- Ruth, V. J., Park, T. S., Gonzales, E. R. and Gidday, J. M. (1993) Adenosine and cerebrovascular hyperemia during insulin-induced hypoglycemia in newborn piglet. *American Journal of Physiology - Heart and Circulatory Physiology*, **265**, H1762-H1768.
- Savelyev, S. A., Rantamaki, T., Rytönen, K. M., Castren, E. and Porkka-Heiskanen, T. (2012) Sleep homeostasis and depression: Studies with the rat clomipramine model of depression. *Neuroscience*, **212**, 149-158.
- Scheller, D., Kolb, J., Peters, U. and Tegmeier, F. (1996) The measurement of extracellular inorganic phosphate gives a more reliable indication for severe impairment of cerebral cell function and cell death than the measurement of extracellular lactate. *Acta neurochirurgica*, **Supplement. 67**, 28-30.
- Schulte, G., Sommerschild, H., Yang, J., Tokuno, S., Goiny, M., Lovdahl, C., Johansson, B., Fredholm, B. B. and Valen, G. (2004) Adenosine A(1) receptors are necessary for protection of the murine heart by remote, delayed adaptation to ischaemia. *Acta Physiologica Scandinavica*, **182**, 133-143.
- Sciotti, V. M., Park, T. S., Berne, R. M. and Van Wylen, D. G. L. (1993a) Changes in extracellular adenosine during chemical or electrical brain stimulation. *Brain Research*, **613**, 16-20.
- Sciotti, V. M., Roche, F. M., Grabb, M. C. and Van Wylen, D. G. L. (1992) Adenosine receptor blockade augments interstitial fluid levels of excitatory amino acids during cerebral ischemia. *Journal of Cerebral Blood Flow and Metabolism*, **12**, 646-655.
- Sciotti, V. M. and Van Wylen, D. G. (1993b) Attenuation of ischemia-induced extracellular adenosine accumulation by homocysteine. *J Cereb Blood Flow Metab*, **13**, 208-213.
- Sciotti, V. M. and Van Wylen, D. G. L. (1993c) Increases in interstitial adenosine and cerebral blood flow with inhibition of adenosine kinase and adenosine deaminase. *Journal of Cerebral Blood Flow and Metabolism*, **13**, 201-207.
- Sharma, R., Engemann, S., Sahota, P. and Thakkar, M. M. (2010b) Role of adenosine and wake-promoting basal forebrain in insomnia and associated sleep disruptions caused by ethanol dependence. *Journal of Neurochemistry*, **115**, 782-794.
- Sharma, R., Engemann, S. C., Sahota, P. and Thakkar, M. M. (2010a) Effects of ethanol on extracellular levels of adenosine in the basal forebrain: An in vivo microdialysis study in freely behaving rats. *Alcoholism: Clinical and Experimental Research*, **34**, 813-818.
- Skarphedinsson, J. O., Sandberg, M., Hagberg, H., Carlsson, S. and Thoren, P. (1989) Relative cerebral ischemia in SHR due to hypotensive hemorrhage: cerebral function, blood flow and extracellular levels of lactate and purine catabolites. *J Cereb Blood Flow Metab*, **9**, 364-372.
- Slezia, A., Kekesi, A. K., Szikra, T., Papp, A. M., Nagy, K., Szenté, M., Magloczky, Z., Freund, T. F. and Juhasz, G. (2004) Uridine release during aminopyridine-induced epilepsy. *Neurobiology of Disease*, **16**, 490-499.
- Song, P., Mabrouk, O. S., Hershey, N. D. and Kennedy, R. T. (2012) In vivo neurochemical monitoring using benzoyl chloride derivatization and liquid chromatography-mass spectrometry. *Analytical Chemistry*, **84**, 412-419.
- Tominaga, M., Tsujimoto, S., Takeshima, T., Miyamoto, K., Ishida, Y., Nishitani, M. and Sakaki, T. (1992) [Purine catabolites and pial arteriolar diameter in transient cerebral ischemia]. *No To Shinkei*, **44**, 807-812.
- Valtysson, J., Persson, L. and Hillered, L. (1998) Extracellular ischaemia markers in repeated global ischaemia and secondary hypoxaemia monitored by microdialysis in rat brain. *Acta Neurochirurgica*, **140**, 387-395.
- Van Wylen, D. G., Park, T. S., Rubio, R. and Berne, R. M. (1986) Increases in cerebral interstitial fluid adenosine concentration during hypoxia, local potassium infusion, and ischemia. *J Cereb Blood Flow Metab*, **6**, 522-528.
- Vazquez-DeRose, J., Schwartz, M. D., Nguyen, A. T., Warriar, D. R., Gulati, S., Mathew, T. K., Neylan, T. C. and Kilduff, T. S. (2014) Hypocretin/orexin antagonism enhances sleep-related adenosine and GABA neurotransmission in rat basal forebrain. *Brain Struct Funct*.
- Verrier, J. D., Jackson, T. C., Bansal, R., Kochanek, P. M., Puccio, A. M., Okonkwo, D. O. and Jackson, E. K. (2012) The brain in vivo expresses the 2',3'-cAMP-adenosine pathway. *Journal of Neurochemistry*, **122**, 115-125.

- Watson, C. S., Schaefer, R., White, S. E., Homan, J. H., Fraher, L., Harding, R. and Bocking, A. D. (2002) Effect of intermittent umbilical cord occlusion on fetal respiratory activity and brain adenosine in late-gestation sheep. *Reproduction Fertility and Development*, **14**, 35-42.
- Watson, C. S., White, S. E., Homan, J. H., Kimura, K. A., Brien, J. F., Fraher, L., Challis, J. R. G. and Bocking, A. D. (1999) Increased cerebral extracellular adenosine and decreased PGE(2) during ethanol-induced inhibition of FBM. *Journal of Applied Physiology*, **86**, 1410-1420.
- Wigren, H. K., Schepens, M., Matto, V., Stenberg, D. and Porkka-Heiskanen, T. (2007) Glutamatergic stimulation of the basal forebrain elevates extracellular adenosine and increases the subsequent sleep. *Neuroscience*, **147**, 811-823.
- Wigren, H. K., Zant, J. C., Sanders, A., Castren, E. and Porkka-Heiskanen, T. (2012) Sleep regulation and brain energy metabolites in genetically modified loss-of-function and gain-of-function brain-derived neurotrophic factor mice. *Journal of Sleep Research*, **21**, 120.
- Wigren, H. K. M., Zant, J., Sanders, A., Castren, E. and Porkka-Heiskanen, T. (2014) Sleep homeostasis in genetically modified loss-of-function and gain-of-function brain-derived neurotrophic factor (BDNF) mice. *Journal of Sleep Research*, **23**, 59-60.
- Yan, S., Laferriere, A., Zhang, C. and Moss, I. R. (1995) Microdialyzed adenosine in nucleus tractus solitarii and ventilatory response to hypoxia in piglets. *Journal of Applied Physiology*, **79**, 405-410.
- Zetterstrom, T., Vernet, L., Ungerstedt, U., Tossman, U., Jonzon, B. and Fredholm, B. B. (1982) Purine levels in the intact rat brain. Studies with an implanted perfused hollow fibre. *Neuroscience letters*, **29**, 111-115.
- Zhang, J. and Niu, X. (1994) Changes of monoamines, purines and amino acids in rat striatum as measured by intercerebral microdialysis during ischemia/reperfusion. *Chinese medical sciences journal = Chung-kuo i hsueh k'o hsueh tsa chih / Chinese Academy of Medical Sciences*, **9**, 225-229.
- Zhu, Y. X., Wong, P. S. H., Zhou, Q., Sotoyama, H. and Kissinger, P. T. (2001) Identification and determination of nucleosides in rat brain microdialysates by liquid chromatography/electrospray tandem mass spectrometry. *Journal of Pharmaceutical and Biomedical Analysis*, **26**, 967-973.
